# Supplementary material
Source: PubMed Central journal article supplement (PMC2773149)

**Structural Perturbations Induced by the  $\alpha$ -Anomer of the Aflatoxin B<sub>1</sub>  
Formamidopyrimidine Adduct in Duplex and Single-Strand DNA**

**Supporting Information**

Kyle L. Brown, Markus W. Voehler, Shane M. Magee, Constance M. Harris, Thomas M. Harris,  
and Michael P. Stone\*

Department of Chemistry and Center in Molecular Toxicology, Vanderbilt University, Nashville,  
Tennessee 37235

\*Author to whom correspondence should be addressed.

Michael P. Stone

Telephone 615-322-2589

FAX 615-322-7591

email: michael.p.stone@vanderbilt.edu

**Table S1.** Resonance Assignments for AFB- $\alpha$ -FAPY Modified 5'-d(C<sup>1</sup>T<sup>2</sup>X<sup>3</sup>A<sup>4</sup>)-3'.

| <i>Nucleotide</i> | <i>Atom</i> | <i>Chemical Shift (ppm)</i> | <i>Nucleotide</i> | <i>Atom</i>      | <i>Chemical Shift (ppm)</i> |
|-------------------|-------------|-----------------------------|-------------------|------------------|-----------------------------|
| C <sup>1</sup>    | H1'         | 5.81                        | A <sup>4</sup>    | H1'              | 6.27                        |
| C <sup>1</sup>    | H2'         | 2.02                        | A <sup>4</sup>    | H2'              | 2.69                        |
| C <sup>1</sup>    | H2''        | 2.40                        | A <sup>4</sup>    | H2''             | 2.51                        |
| C <sup>1</sup>    | H3'         | 4.53                        | A <sup>4</sup>    | H3'              | 4.62                        |
| C <sup>1</sup>    | H4'         | 3.92                        | A <sup>4</sup>    | H4'              | 4.17                        |
| C <sup>1</sup>    | H5          | 5.54                        | A <sup>4</sup>    | H5'              | 4.00                        |
| C <sup>1</sup>    | H5'         | 3.58                        | A <sup>4</sup>    | H5''             | 3.96                        |
| C <sup>1</sup>    | H6          | 7.48                        | A <sup>4</sup>    | H8               | 8.29                        |
| T <sup>2</sup>    | H1'         | 6.19                        | AFB <sup>5</sup>  | H5               | 5.72                        |
| T <sup>2</sup>    | H2'         | 2.21                        | AFB <sup>5</sup>  | H5B              | 5.71                        |
| T <sup>2</sup>    | H2''        | 2.37                        | AFB <sup>5</sup>  | H6a              | 6.13                        |
| T <sup>2</sup>    | H3'         | 4.71                        | AFB <sup>5</sup>  | H8               | 5.66                        |
| T <sup>2</sup>    | H4'         | 4.28                        | AFB <sup>5</sup>  | H9               | 6.16                        |
| T <sup>2</sup>    | H5'         | 3.92                        | AFB <sup>5</sup>  | H9a              | 3.66                        |
| T <sup>2</sup>    | H5''        | 3.89                        | AFB <sup>5</sup>  | OCH <sup>3</sup> | 3.76                        |
| T <sup>2</sup>    | H6          | 7.54                        |                   |                  |                             |
| T <sup>2</sup>    | M7          | 1.70                        |                   |                  |                             |
| X <sup>3</sup>    | H1'         | 5.62                        |                   |                  |                             |
| X <sup>3</sup>    | H2'         | 2.30                        |                   |                  |                             |

|                |      |      |  |
|----------------|------|------|--|
| X <sup>3</sup> | H2'' | 1.88 |  |
| X <sup>3</sup> | H3'  | 4.54 |  |
| X <sup>3</sup> | H4'  | 4.11 |  |
| X <sup>3</sup> | H5'  | 3.82 |  |
| X <sup>3</sup> | H5'' | 3.74 |  |
| X <sup>3</sup> | H8   | 8.27 |  |

**Figure S1.** Electronic circular dichroism of the AFB- $\alpha$ -FAPY and AFB- $\beta$ -FAPY anomers in oligodeoxynucleotides. The duplex 5'-d(CTATXATTCA)-3'•5'-d(TGAATCATAG)-3' (panel A) was compared to 5'-d(CTATXATTCA)-3' (panel B). Unmodified oligodeoxynucleotides (solid black line) were compared to oligodeoxynucleotides containing the AFB- $\beta$ -FAPY (broken black line) and AFB- $\alpha$ -FAPY (solid red line) adducts.

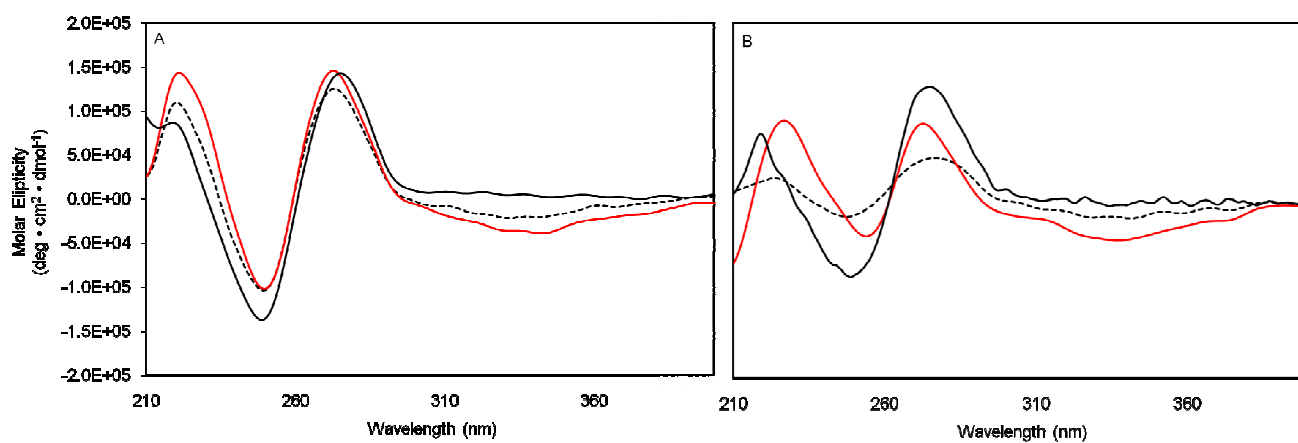

**Figure S2.** UV spectra of AFB-FAPY modified 5'-d(CTATXATTCA)-3'. The spectra of the  $\alpha$  anomer (—) is compared to that of the  $\beta$  anomer (—) in **panel A**. The absorbance units on the Y-axis are normalized to the maximum absorbance of 1.0. The spectrum of the  $\alpha$  anomer (—) is compared to that of the chromatographically inseparable shoulder preceding the main  $\alpha$  anomer peak (—) in **panel B**.

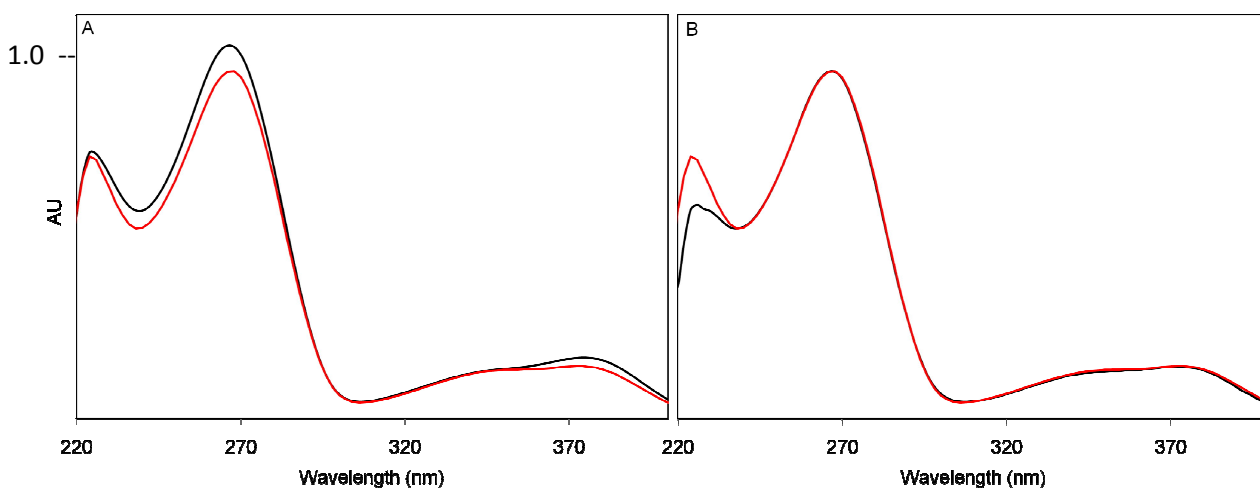

**Figure S3.** NOESY assignments of purine H8 and pyrimidine H6 protons to deoxyribose H1' protons for the AFB- $\alpha$ -FAPY modified duplex 5'-d(CTAT $\underline{X}$ ATTCA)-3'•5'-d(TGAATCATAG)-3'. **Panel A:** The connectivity for the modified strand was broken between T<sup>4</sup> H1' and A<sup>6</sup> H8. **Panel B:** The connectivity for the complementary strand was broken between C<sup>16</sup> H6 and A<sup>17</sup> H1'. The intra-nucleotide purine H8 and pyrimidine H6 to deoxyribose H1' cross peaks are labeled.

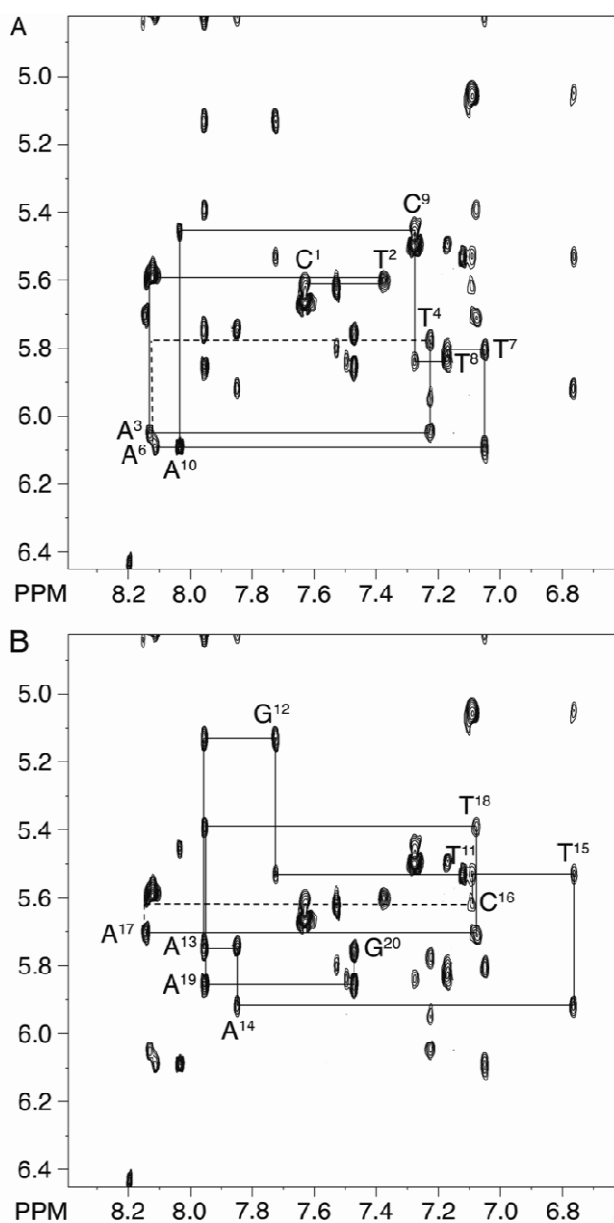

**Figure S4. Upper Panel.** NOE connectivity for the Watson-Crick base paired amino protons of the AFB- $\alpha$ -FAPY modified duplex. The cross peaks are: a, AFB OCH<sub>3</sub>→X<sup>5</sup> H3; b, C<sup>16</sup> H41→X<sup>5</sup> H3; c, X<sup>5</sup> H21→X<sup>5</sup> H3; d, X<sup>5</sup> H22→X<sup>5</sup> H3; e, A<sup>6</sup> H61→X<sup>5</sup> H3; f, C<sup>16</sup> H42→X<sup>5</sup> H3; g, C<sup>9</sup> H42→G<sup>12</sup> H1; h, C<sup>1</sup> H42→G<sup>20</sup> H1; i, A<sup>13</sup> H61→G<sup>12</sup> H1; j, C<sup>9</sup> H41→G<sup>12</sup> H1; k, C<sup>9</sup> H5→G<sup>12</sup> H1; l, AFB OCH<sub>3</sub>→T<sup>4</sup> H3; m, A<sup>3</sup> H61→T<sup>18</sup> H3; n, A<sup>17</sup> H62→T<sup>4</sup> H3; o, A<sup>17</sup> H61→T<sup>4</sup> H3; p, A<sup>3</sup> H2→T<sup>18</sup> H3; q, A<sup>17</sup> H2→T<sup>4</sup> H3; r, A<sup>6</sup> H2→T<sup>15</sup> H3; s, A<sup>14</sup> H61→T<sup>15</sup> H3; t, A<sup>6</sup> H62→T<sup>15</sup> H3; u, A<sup>14</sup> H62→T<sup>7</sup> H3; v, A<sup>14</sup> H61→T<sup>7</sup> H3; w, A<sup>14</sup> H2→T<sup>7</sup> H3; x, A<sup>13</sup> H2→T<sup>8</sup> H3; y, A<sup>13</sup> H61→T<sup>8</sup> H3; z, A<sup>13</sup> H62→T<sup>8</sup> H3. **Lower Panel.** NOE connectivity for the Watson-Crick hydrogen bonded imino protons of the AFB- $\alpha$ -FAPY modified duplex. The data was collected at 500 MHz. using a mixing time of 250 ms. The temperature was 5 °C.

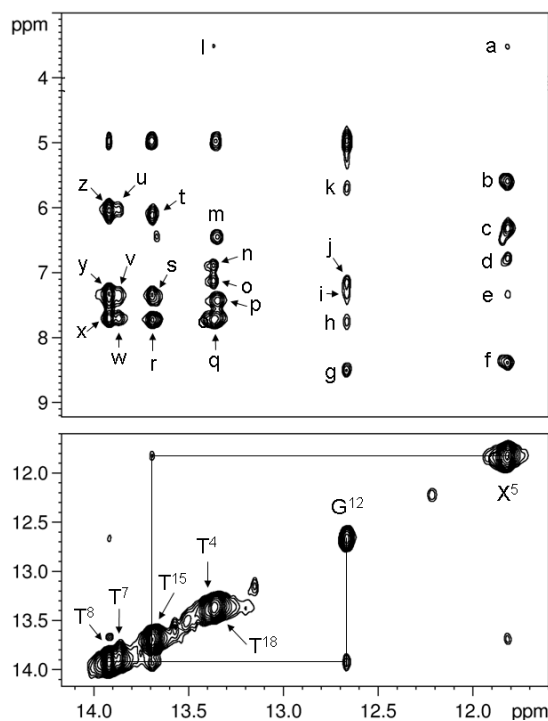

**Figure S5.**  $^{31}\text{P}$  NMR of AFB- $\alpha$ -FAPY in 5'-d(C<sup>1</sup>T<sup>2</sup>A<sup>3</sup>T<sup>4</sup>X<sup>5</sup>A<sup>6</sup>T<sup>7</sup>T<sup>8</sup>C<sup>9</sup>A<sup>10</sup>)-3'•5'-d(T<sup>11</sup>G<sup>12</sup>A<sup>13</sup>A<sup>14</sup>T<sup>15</sup>C<sup>16</sup>A<sup>17</sup>T<sup>18</sup>A<sup>19</sup>G<sup>20</sup>)-3' (upper panel) and in 5'-d(C<sup>1</sup>T<sup>2</sup>X<sup>3</sup>A<sup>4</sup>)-3' (lower panel). The phosphate resonance of C<sup>16</sup> was observed at 0.9 ppm (upper panel).

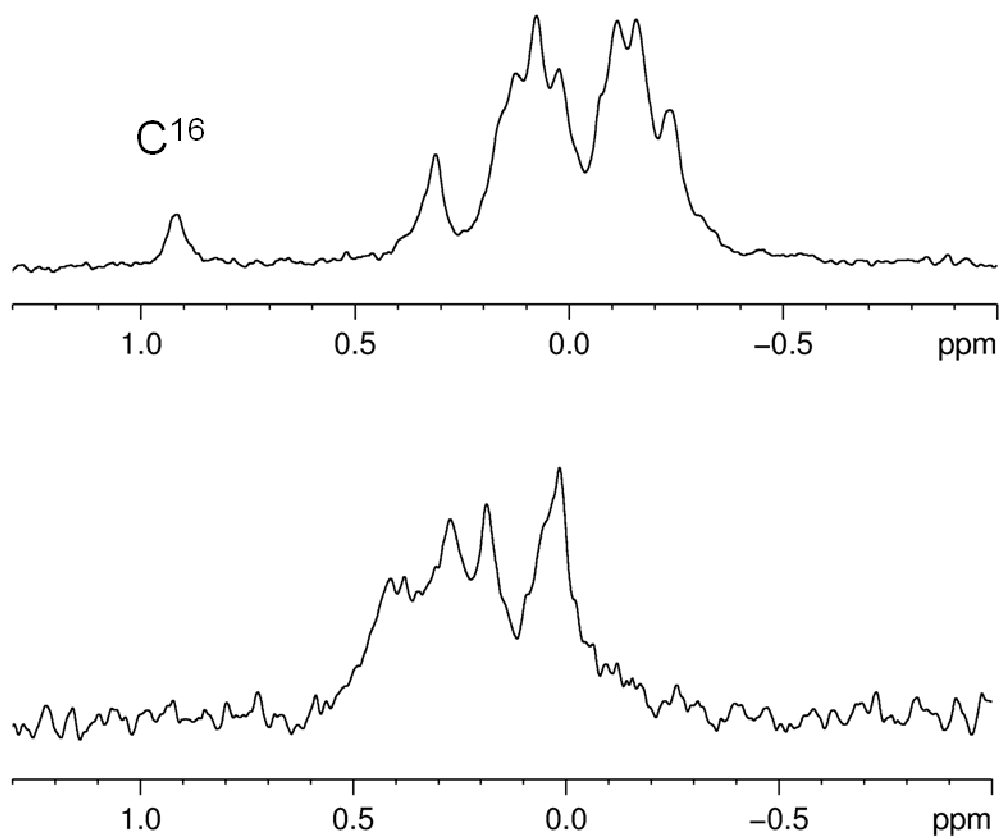



**Figure S6.**  $^1\text{H}$  NMR of AFB- $\alpha$ -FAPY modified tetramer aromatic

protons. A single formyl proton resonance assigned as the *E* isomer was observed at 5 °C (lower panel). A formyl resonance assigned as the *Z* isomer was apparent at 30 °C (upper panel).

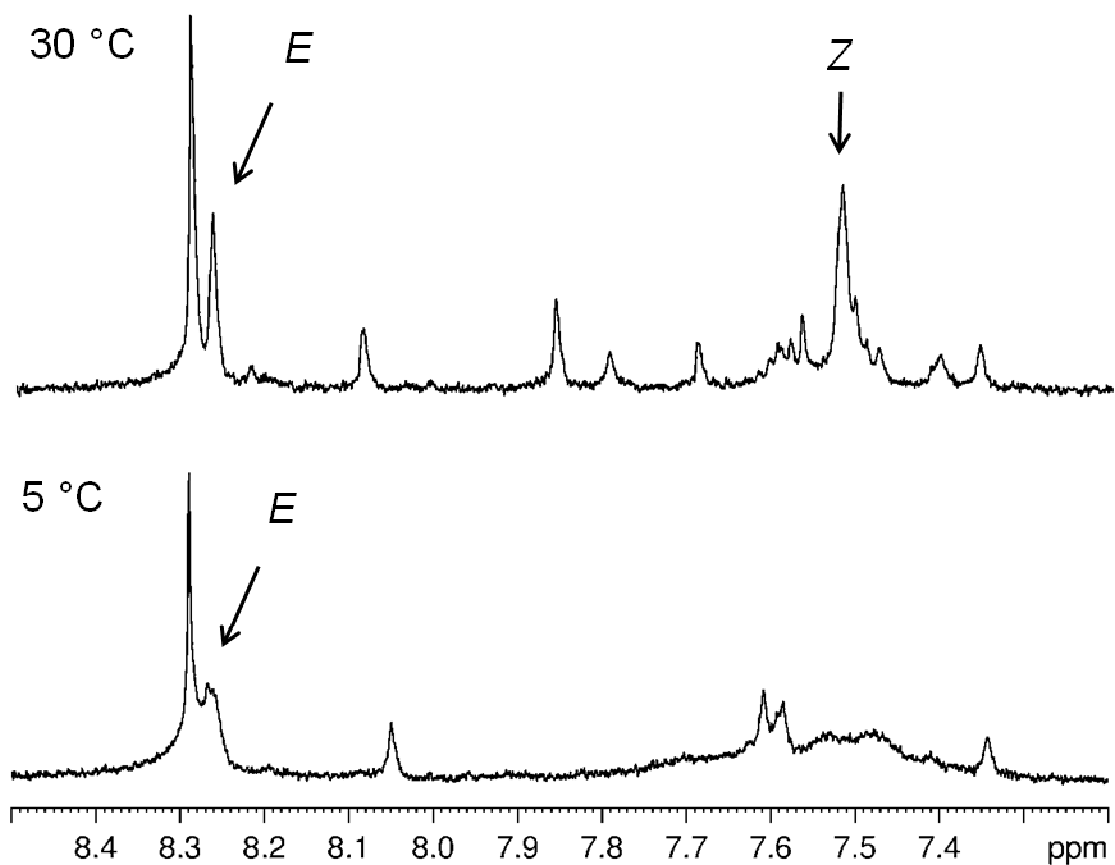

**Figure S7.** NOE assignments of AFB inter-nucleotide and deoxyribose intra-nucleotide cross-peaks for the AFB- $\alpha$ -FAPY modified 5'-d(C<sup>1</sup>T<sup>2</sup>X<sup>3</sup>A<sup>4</sup>)-3'. The cross peaks are assigned as (a) A<sup>4</sup> H4'→A<sup>4</sup> H1' (b) AFB OCH<sub>3</sub>→T<sup>2</sup> H1' (c) AFB H9a→ AFB H9 (d) AFB H9a→ AFB H6a (e) A<sup>4</sup> H2'→A<sup>4</sup> H1' (f) A<sup>4</sup> H2''→A<sup>4</sup> H1' (g) T<sup>2</sup> H2''→T<sup>2</sup> H1' (h) T<sup>2</sup> H2'→T<sup>2</sup> H1' (i) C<sup>1</sup> H2'→C<sup>1</sup> H1' (j) C<sup>1</sup> H2''→C<sup>1</sup> H1' (k) AFB OCH<sub>3</sub>→ AFB H5 (l) X<sup>3</sup> H5''→X<sup>3</sup> H1' (m) X<sup>3</sup> H2'→ AFB H5 (n) X<sup>3</sup> H2''→ AFB H5 (o) X<sup>3</sup> H2''→X<sup>3</sup> H1' (p) X<sup>3</sup> H2'→X<sup>3</sup> H1'.

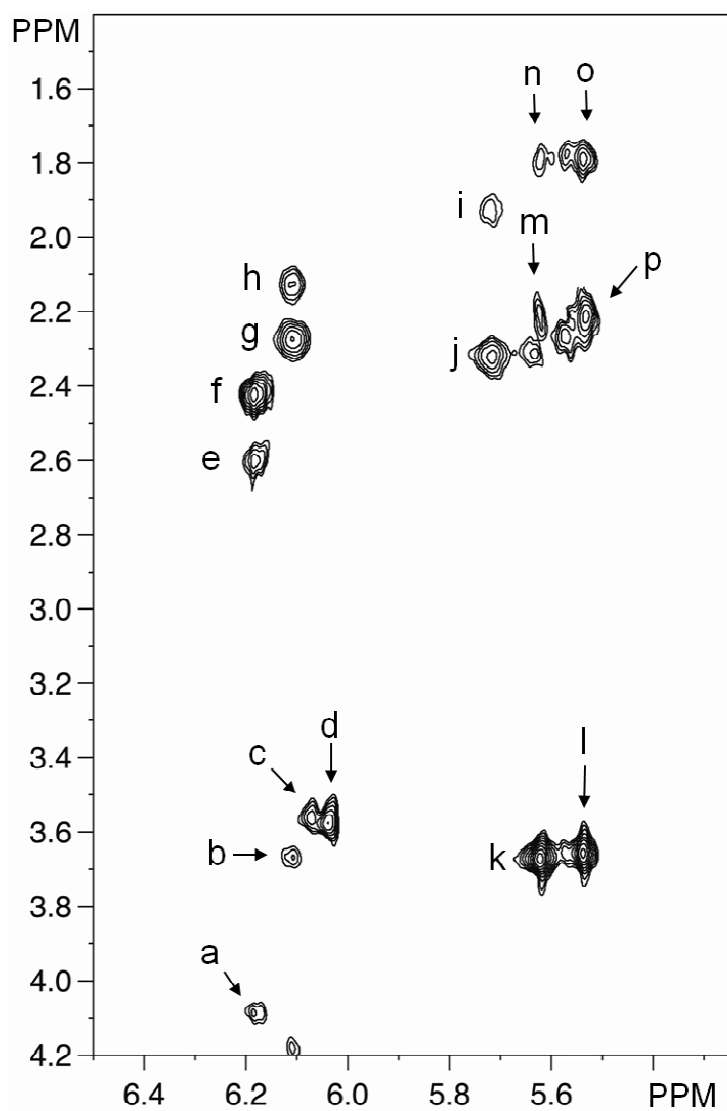

Supplement: ja902052v_si_001.pdf [file ja902052v_si_001.pdf]
